1 Semantic computational analysis of anticoagulation use in atrial fibrillation from real world  
2 data

3 Daniel M. Bean<sup>1,2\*</sup>, James Teo<sup>3</sup>, Honghan Wu<sup>4,5,6</sup>, Ricardo Oliveira<sup>7</sup>, Raj Patel<sup>8</sup>, Rebecca  
4 Bendayan<sup>1,9</sup>, Ajay M. Shah<sup>10,11</sup>, Richard J. B. Dobson<sup>1,2,9,12</sup>, Paul A. Scott<sup>10,11\*</sup>

## 5 **Author affiliations**

- 6 1. Department of Biostatistics and Health Informatics, Institute of Psychiatry,  
7 Psychology and Neuroscience, King's College London, London, U.K.
- 8 2. Health Data Research UK London, University College London, London, U.K.
- 9 3. Department of Stroke and Neurology, King's College Hospital NHS Foundation  
10 Trust, London, U.K.
- 11 4. Centre for Medical Informatics, Usher Institute, University of Edinburgh, U.K.
- 12 5. School of Computer and Software, Nanjing University of Information Science and  
13 Technology, Nanjing, China
- 14 6. Health Data Research UK Scotland, Edinburgh, UK
- 15 7. Unidade de Doenças Imunomediadas Sistémicas (UDIMS), S. Medicina IV, Hospital  
16 Prof. Doutor Fernando Fonseca, Amadora Portugal
- 17 8. Department of Haematology, King's College Hospital NHS Foundation Trust,  
18 London, U.K.
- 19 9. NIHR Biomedical Research Centre at South London and Maudsley NHS Foundation  
20 Trust and King's College London, London, U.K.
- 21 10. British Heart Foundation Centre, King's College London, London, U.K.
- 22 11. Department of Cardiology, King's College Hospital NHS Foundation Trust, London,  
23 U.K.
- 24 12. Institute of Health Informatics, University College London, London, U.K.

**NOTE: This preprint reports new research that has not been certified by peer review and should not be used to guide clinical practice.**

25

26 **\*Corresponding authors**

27 Email: [paulscott3@nhs.net](mailto:paulscott3@nhs.net) (PAS); [daniel.bean@kcl.ac.uk](mailto:daniel.bean@kcl.ac.uk) (DMB)

28

29

30

31

32

33

34

35

36

37

38

39

40

41

42

## 43 **Abstract**

44 Atrial fibrillation (AF) is the most common arrhythmia and significantly increases stroke risk.

45 This risk is effectively managed by oral anticoagulation. Recent studies using national  
46 registry data indicate increased use of anticoagulation resulting from changes in guidelines  
47 and the availability of newer drugs.

48 The aim of this study is to develop and validate an open source risk scoring pipeline for free-  
49 text electronic health record data using natural language processing.

50 AF patients discharged from 1<sup>st</sup> January 2011 to 1<sup>st</sup> October 2017 were identified from  
51 discharge summaries (N=10,030, 64.6% male, average age  $75.3 \pm 12.3$  years). A natural  
52 language processing pipeline was developed to identify risk factors in clinical text and  
53 calculate risk for ischaemic stroke (CHA<sub>2</sub>DS<sub>2</sub>-VASc) and bleeding (HAS-BLED). Scores  
54 were validated vs two independent experts for 40 patients.

55 Automatic risk scores were in strong agreement with the two independent experts for  
56 CHA<sub>2</sub>DS<sub>2</sub>-VASc (average kappa 0.78 vs experts, compared to 0.85 between experts).  
57 Agreement was lower for HAS-BLED (average kappa 0.54 vs experts, compared to 0.74  
58 between experts).

59 In high-risk patients (CHA<sub>2</sub>DS<sub>2</sub>-VASc  $\geq 2$ ) OAC use has increased significantly over the last  
60 7 years, driven by the availability of DOACs and the transitioning of patients from AP  
61 medication alone to OAC. Factors independently associated with OAC use included  
62 components of the CHA<sub>2</sub>DS<sub>2</sub>-VASc and HAS-BLED scores as well as discharging specialty  
63 and frailty. OAC use was highest in patients discharged under cardiology (69%).

64 Electronic health record text can be used for automatic calculation of clinical risk scores at  
65 scale. Open source tools are available today for this task but require further validation.

66 Analysis of routinely-collected EHR data can replicate findings from large-scale curated  
67 registries.

68

69 **Keywords**

70 Natural language processing, electronic health records

71 **Abbreviations**

72 AF = atrial fibrillation

73 AP = antiplatelet

74 DOAC = direct oral anticoagulant

75 EHR = electronic health record

76 NLP = natural language processing

77 OAC = oral anticoagulant

## 78 **Introduction**

79 Atrial fibrillation (AF) affects 2% of the UK population and significantly increases stroke  
80 risk.[1] Although this risk can be substantially reduced by oral anticoagulants (OAC),  
81 warfarin has historically been underused in AF. Over the last decade the antithrombotic  
82 landscape has changed significantly with: (1) the introduction of direct oral anticoagulants  
83 (DOACs), and (2) the updated UK NICE 2014 AF guidelines[2] which introduced the  
84 CHA<sub>2</sub>DS<sub>2</sub>-VASc[3] and HAS-BLED[4] risk calculators and removed endorsement of the use  
85 of antiplatelet agents for stroke prevention. A number of large-scale observational studies  
86 have found that rates of OAC use have significantly increased since the introduction of  
87 DOACs.[5–8] However, these previous analyses have used structured data, which do not  
88 capture the full clinical narrative, and many studies have used registry data which can be  
89 costly and time-consuming to collect and may not always accurately reflect real-world  
90 practice.

91 An alternative approach to observational research is the use of Electronic Health Record  
92 (EHRs) data generated as part of routine clinical care.[9] Modern EHRs contain a  
93 combination of structured (e.g. age, sex) and unstructured (e.g. free text, image) data. Whilst  
94 free text is information-dense to a human reader, to be useful for computational analysis it  
95 requires conversion to a structured format. Performing this process manually is very labour-  
96 intensive. However, given the enormous volume of clinical data contained solely in written  
97 notes[10], extracting this information is critical to realizing the full potential of EHRs.

98 Natural language processing (NLP) uses computer algorithms to identify key elements in  
99 everyday language and extract meaning from spoken or written language. NLP can be used to  
100 convert unstructured text found in EHRs to structured data. This should allow rapid, low-cost

101 and automated analysis of medical text, including the generation of observational data for  
102 research purposes.

103 In this study we develop an NLP pipeline to calculate clinical risk scores from free text. We  
104 build upon our existing data pooling, harmonization and information retrieval tool  
105 (CogStack[11,12]), together with a semantic NLP tool for information extraction  
106 (SemEHR[13,14]). Previous studies have found it is possible to accurately predict CHA<sub>2</sub>DS<sub>2</sub>-  
107 VASc using EHR text.[15–17] We build on this work to develop a flexible open source  
108 pipeline and calculate additional risk scores. Our specific objectives are to:

- 109 a) Develop and validate an NLP risk scoring pipeline.
- 110 b) Explore trends in antithrombotic medication use for AF including the impact  
111 of the availability of DOACs and changes in NICE 2014 guidelines.
- 112 c) Quantify the association between antithrombotic medication use and relevant  
113 clinical patient-level variables.

114

## 115 **Methods**

### 116 **Data, materials and code**

117 A subset of the dataset limited to anonymisable information (e.g. only UMLS codes and  
118 demographics) is available on request to researchers with suitable training in information  
119 governance and human confidentiality protocols; contact [jamesteo@nhs.net](mailto:jamesteo@nhs.net). All code for  
120 calculating risk scores is open-source in GitHub at [https://github.com/CogStack/risk-score-](https://github.com/CogStack/risk-score-builder)  
121 [builder](https://github.com/CogStack/risk-score-builder) . Source text from patient records used in the study will not be available due to  
122 inability to fully anonymise up to the Information Commissioner Office (ICO) standards.  
123 Risk factor-level data is available as S3 Table.

124

### 125 **Ethical approval**

126 This study was performed on anonymised data as a clinical audit for service evaluation. The  
127 project was reviewed by the King's College Hospital Information Governance committee  
128 chaired by the Caldicott Guardian Professor Alastair Baker (the Caldicott Guardian is the  
129 statutory individual responsible for protecting the confidentiality of health and care  
130 information in a UK healthcare organisation) and approval was granted in November 2018  
131 with continued oversight. The legal basis of secondary use was analysis for service  
132 evaluation, operational performance and clinical audit.

133

### 134 **Cohort selection**

135 We used an open-source retrieval system for unstructured clinical data (CogStack)[11,12] to  
136 define a cohort of patients aged  $\geq 18$  with AF admitted to KCH between 01-01-2011 and 01-

137 10-2017. We searched discharge summaries for adult inpatients discharged alive containing  
138 the exact keywords “AF”, “PAF”, “AFib” or “Atrial Fibrillation”. Although the risk of stroke  
139 and OAC indications in atrial flutter are similar to AF, in clinical practice in the UK many  
140 patients with isolated typical flutter undergo flutter ablation after which there is significant  
141 variation in practice in terms of long-term OAC prescription. For this reason we decided not  
142 to include patients with flutter. Patients with missing data such as gender or discharge ward  
143 were excluded (N=397). We also excluded patients discharged directly from the emergency  
144 department, day units or the clinical decision unit, as these did not constitute an inpatient  
145 admission and did not generate the discharge summaries we used to identify discharge  
146 medication and diagnosis of AF.

147

148 We further refined our cohort using an NLP pipeline SemEHR[13,14] which generates  
149 semantic annotation and can detect negation, temporality (current, historic) and experiencer.  
150 We excluded patients for which the NLP pipeline detected negation, a hypothetical mention  
151 or another experiencer (the mention refers to another individual who is not the patient e.g.  
152 family history) for AF.

153

154 We defined a new diagnosis of AF as the first mention of AF in a patient with at least one  
155 previous visit and no earlier record of AF or prescription of antithrombotic medication.

156

## 157 **CHA<sub>2</sub>DS<sub>2</sub>-VASc and HAS-BLED risk score calculation**

158 We used the SemEHR NLP pipeline to annotate clinical documents with Unified Medical  
159 Language System (UMLS) concepts.[18] To calculate CHA<sub>2</sub>DS<sub>2</sub>-VASc and HAS-BLED risk  
160 scores, we manually mapped each phenotypic component of the score (e.g. stroke) to the



161 closest general term in the Human Phenotype Ontology (HPO)[19] and automatically  
162 included all descendent terms in the ontology. All HPO concepts were then mapped  
163 automatically to UMLS. Medications were manually mapped to UMLS concepts directly (as  
164 they are not present in HPO), and the first child terms are included automatically using  
165 UMLS concept relationships. The only factor not included was a labile International  
166 Normalised Ratio (INR) in the HAS-BLED score, which is not in HPO and is ambiguous in  
167 UMLS, and which is not reliably recorded in the dataset.

168  
169 The result is a mapping of each score component to a list of UMLS concepts, which was  
170 manually refined based on manual review of a random sample of 205 patients by a single  
171 annotator. The final mapping is available as S1 Table. For each component we then identified  
172 matching annotations in medical records using the NLP pipeline and awarded points as  
173 defined for each score.

174  
175 For patients with multiple admissions (and the possibility of change in risk scores over time)  
176 we used the most recent admission to calculate risk scores.

177

## 178 **Antithrombotic Drug Prescription**

179 Antithrombotic prescriptions of OACs (apixaban, rivaroxaban, dabigatran, edoxaban,  
180 warfarin) and antiplatelets (AP; aspirin, clopidogrel, dipyridamole, ticagrelor, prasugrel) were  
181 extracted from free text discharge summaries. This was performed using a custom NLP  
182 pipeline written in Python and specifically adapted to the KCH record structure. Drug  
183 mentions are identified by fuzzy matching and any detected mentions are tested for negation  
184 using regular expressions. The open source code is available at  
185 <https://github.com/CogStack/OAC-NLP>.

186

## 187 **Hospital Frailty Risk Score (HFRS) Calculation**

188 We calculated the Hospital Frailty Risk Score (HFRS) proposed by Gilbert *et al.* [20] which  
189 uses ICD-10 diagnostic codes to identify a group of patients at higher risk of adverse  
190 outcomes. We mapped these ICD-10 codes to UMLS concept unique identifiers (CUI) using  
191 bio-ontology.[21] We used SemEHR to detect all UMLS concepts in free text and calculate  
192 the total frailty risk as the sum of concept weights as defined by Gilbert *et al.*.[20]

193

## 194 **Validation of AF diagnosis, Antithrombotic drug prescription and** 195 **NLP risk scores**

196 The diagnosis of AF and antithrombotic drug prescriptions were manually validated on a  
197 random sample of 300 discharge summaries (AF diagnosis) or 200 discharge summaries  
198 (prescription) taken from our cohort. Performance was measured by calculating the precision,  
199 recall and F1 score.

200

201 CHA<sub>2</sub>DS<sub>2</sub>-VASc and HAS-BLED risk scores were validated for a sample of 40 patients  
202 selected at random after stratification by gender and age (this sample does not overlap with  
203 the initial sample used to refine the automated scoring). Each patient was manually scored for  
204 all components of CHA<sub>2</sub>DS<sub>2</sub>-VASc and HAS-BLED by two independent expert clinicians  
205 according to agreed criteria (see S1 Table). Inter-annotator agreement for the final scores was  
206 calculated using a weighted Cohen's kappa. Given the high-dimensional complexity of the  
207 HFRS, we did not attempt to validate it and instead compared the score distribution to the  
208 original findings of Gilbert *et al.*.[20]

209

## 210 **Statistical analysis**

211 Categorical variables are expressed as percentages and compared using a chi-squared test.

212 Normally distributed continuous variables are expressed as mean+/-standard deviation and

213 compared using Student *t* test. Skewed continuous variables (length of stay, number of visits,

214 HFRS) are expressed as median (minimum-maximum) and compared using a Kruskal-Wallis

215 H-test. Statistical analyses were performed using the StatsModels and scipy libraries in

216 Python. In all analyses a  $P<0.05$  was considered significant.

217

218 We evaluated temporal trends in the rates of prescription of antithrombotic drugs for patients

219 at high stroke risk ( $\text{CHA}_2\text{DS}_2\text{-VASc} \geq 2$ ) using linear regression with quarterly data,

220 retaining the last visit per quarter for each patient.

221

222 The association of individual risk score ( $\text{CHA}_2\text{DS}_2\text{-VASc}$  and HAS-BLED) components and

223 other clinical variables with antithrombotic prescription were evaluated in univariate and

224 multivariate analyses. Factors with a significant association ( $P<0.05$ ) in univariate analysis

225 were entered into multivariate models. These associations were estimated using odds ratios

226 from logistic regression. Uncontrolled hypertension and concomitant alcohol abuse were not

227 included in the models as there were too few positive cases in our validation data.

228 Concomitant drugs increasing bleeding risk were also excluded as this includes antiplatelets

229 which could be prescribed for anticoagulation.

230

231

## 232 Results

### 233 Cohort identification

234 We identified 11,260 adult patients admitted to KCH with a diagnosis of AF. After excluding  
 235 1,230 patients (Fig 1) we were left with a final cohort of 10,030 patients admitted 17,387  
 236 times during the prescribing study period and 151,174 times in total (Table 1).

237

238

239 **Fig 1. Derivation of the study cohort.** AF = Atrial fibrillation, NLP = natural language  
 240 processing.

241

242 **Table 1. Baseline characteristics of study cohort.**

| <i>Factor</i>                           |                                 | <i>Total<br/>(n=10030)</i> | <i>Any OAC<br/>(n=5287)</i> | <i>Warfarin<br/>(n=3328)</i> | <i>DOAC<br/>(n=1873)</i> | <i>AP only<br/>(n=1902)</i> | <i>No<br/>Antithrombotic<br/>medication<br/>(n=1998)</i> | <i>P-value</i> |
|-----------------------------------------|---------------------------------|----------------------------|-----------------------------|------------------------------|--------------------------|-----------------------------|----------------------------------------------------------|----------------|
| <i>Other<br/>clinical<br/>variables</i> | <b>Age (y)</b>                  | 75.3 ± 12.3                | 75.1 ± 11.5                 | 74.4 ± 11.1                  | 76.4 ± 12.1              | 77.5 ± 12.5                 | 74.5 ± 14.3                                              | <0.001         |
|                                         | <b>Frailty (HFRS)</b>           | 2.5 (0.0-28.1)             | 2.0 (0.0-28.1)              | 1.8 (0.0-23.0)               | 3.2 (0.0-28.1)           | 3.2 (0.0-20.5)              | 3.2 (0.0-28.1)                                           | <0.001         |
|                                         | <b>LOS (days)</b>               | 6.5 (0.0-390.0)            | 6.2 (0.0-360.4)             | 6.2 (0.0-326.2)              | 6.2 (0.0-360.4)          | 6.4 (0.0-253.7)             | 5.8 (0.0-390.0)                                          | 0.019          |
|                                         | <b>Previous admissions (n)</b>  | 7.0 (1.0-242.0)            | 8.0 (1.0-242.0)             | 7.0 (1.0-178.0)              | 9.0 (1.0-242.0)          | 6.0 (1.0-215.0)             | 8.0 (1.0-189.0)                                          | <0.001         |
| <i>CHA2DS2-VASc factors</i>             | <b>Congestive heart failure</b> | 3238 (32.3%)               | 1992 (37.7%)                | 1254 (37.7%)                 | 711 (38.0%)              | 529 (27.8%)                 | 511 (25.6%)                                              | <0.001         |
|                                         | <b>Diabetes mellitus</b>        | 5722 (57.0%)               | 3222 (60.9%)                | 2044 (61.4%)                 | 1125 (60.1%)             | 984 (51.7%)                 | 976 (48.9%)                                              | <0.001         |
|                                         | <b>Female</b>                   | 4351 (43.4%)               | 2277 (43.1%)                | 1371 (41.2%)                 | 866 (46.2%)              | 911 (47.9%)                 | 886 (44.3%)                                              | <0.001         |
|                                         | <b>Hypertension</b>             | 6828 (68.1%)               | 3664 (69.3%)                | 2226 (66.9%)                 | 1376 (73.5%)             | 1323 (69.6%)                | 1256 (62.9%)                                             | <0.001         |
|                                         | <b>Stroke</b>                   | 4824 (48.1%)               | 2607 (49.3%)                | 1528 (45.9%)                 | 1028 (54.9%)             | 967 (50.8%)                 | 952 (47.6%)                                              | <0.001         |
|                                         | <b>Vascular disease</b>         | 3132 (31.2%)               | 1710 (32.3%)                | 1082 (32.5%)                 | 600 (32.0%)              | 562 (29.6%)                 | 429 (21.5%)                                              | <0.001         |
|                                         | <b>0</b>                        | 156 (1.6%)                 | 58 (1.1%)                   | 29 (0.9%)                    | 29 (1.6%)                | 22 (1.2%)                   | 72 (3.6%)                                                |                |

|                                      |                                    |              |              |              |              |             |             |        |
|--------------------------------------|------------------------------------|--------------|--------------|--------------|--------------|-------------|-------------|--------|
| <b>CHA2DS<sub>2</sub>-VASc score</b> | <b>1</b>                           | 392 (3.9%)   | 168 (3.2%)   | 118 (3.5%)   | 46 (2.5%)    | 78 (4.1%)   | 112 (5.6%)  |        |
|                                      | <b>2</b>                           | 932 (9.3%)   | 451 (8.5%)   | 306 (9.2%)   | 143 (7.6%)   | 171 (9.0%)  | 207 (10.4%) |        |
|                                      | <b>3</b>                           | 1405 (14.0%) | 707 (13.4%)  | 482 (14.5%)  | 214 (11.4%)  | 227 (11.9%) | 312 (15.6%) |        |
|                                      | <b>4</b>                           | 1700 (16.9%) | 891 (16.9%)  | 608 (18.3%)  | 268 (14.3%)  | 303 (15.9%) | 345 (17.3%) |        |
|                                      | <b>5</b>                           | 1853 (18.5%) | 1001 (18.9%) | 625 (18.8%)  | 364 (19.4%)  | 370 (19.4%) | 338 (16.9%) |        |
|                                      | <b>6</b>                           | 1651 (16.5%) | 899 (17.0%)  | 540 (16.2%)  | 337 (18.0%)  | 338 (17.8%) | 310 (15.5%) |        |
|                                      | <b>7</b>                           | 1138 (11.3%) | 628 (11.9%)  | 350 (10.5%)  | 269 (14.4%)  | 249 (13.1%) | 180 (9.0%)  |        |
|                                      | <b>8</b>                           | 613 (6.1%)   | 371 (7.0%)   | 211 (6.3%)   | 153 (8.2%)   | 115 (6.0%)  | 92 (4.6%)   |        |
|                                      | <b>9</b>                           | 190 (1.9%)   | 113 (2.1%)   | 59 (1.8%)    | 50 (2.7%)    | 29 (1.5%)   | 30 (1.5%)   |        |
|                                      | <b>Total</b>                       | 4.7 ± 2.0    | 4.8 ± 2.0    | 4.7 ± 1.9    | 5.0 ± 2.0    | 4.8 ± 2.0   | 4.3 ± 2.1   | <0.001 |
| <b>HAS-BLED factors*</b>             | <b>Abnormal liver function</b>     | 532 (5.3%)   | 240 (4.5%)   | 150 (4.5%)   | 89 (4.8%)    | 97 (5.1%)   | 176 (8.8%)  | <0.001 |
|                                      | <b>Abnormal renal function</b>     | 1706 (17.0%) | 937 (17.7%)  | 539 (16.2%)  | 380 (20.3%)  | 307 (16.1%) | 355 (17.8%) | <0.001 |
|                                      | <b>Alcohol</b>                     | 75 (0.8%)    | 75 (1.4%)    | 26 (0.8%)    | 47 (2.5%)    | 0 (0.0%)    | 0 (0.0%)    | <0.001 |
|                                      | <b>Bleeding</b>                    | 1429 (14.2%) | 604 (11.4%)  | 348 (10.5%)  | 241 (12.9%)  | 269 (14.1%) | 483 (24.2%) | <0.001 |
|                                      | <b>Drugs increasing bleed risk</b> | 3504 (34.9%) | 3504 (66.3%) | 2130 (64.0%) | 1317 (70.3%) | -           | -           | -      |
| <b>HAS-BLED score</b>                | <b>0</b>                           | 681 (6.8%)   | 204 (3.9%)   | 141 (4.2%)   | 62 (3.3%)    | 148 (7.8%)  | 194 (9.7%)  |        |
|                                      | <b>1</b>                           | 2716 (27.1%) | 1053 (19.9%) | 723 (21.7%)  | 314 (16.8%)  | 650 (34.2%) | 638 (31.9%) |        |
|                                      | <b>2</b>                           | 3528 (35.2%) | 1780 (33.7%) | 1186 (35.6%) | 568 (30.3%)  | 783 (41.2%) | 721 (36.1%) |        |
|                                      | <b>3</b>                           | 2190 (21.8%) | 1488 (28.1%) | 866 (26.0%)  | 596 (31.8%)  | 267 (14.0%) | 359 (18.0%) |        |
|                                      | <b>4</b>                           | 763 (7.6%)   | 618 (11.7%)  | 338 (10.2%)  | 267 (14.3%)  | 53 (2.8%)   | 79 (4.0%)   |        |
|                                      | <b>5</b>                           | 135 (1.4%)   | 127 (2.4%)   | 65 (1.9%)    | 59 (3.1%)    | 1 (0.1%)    | 7 (0.3%)    |        |
|                                      | <b>6</b>                           | 17 (0.2%)    | 17 (0.3%)    | 9 (0.3%)     | 7 (0.4%)     | 0 (0.0%)    | 0 (0.0%)    |        |
|                                      | <b>Total</b>                       | 2.0 ± 1.1    | 2.3 ± 1.1    | 2.2 ± 1.1    | 2.5 ± 1.1    | 1.7 ± 0.9   | 1.8 ± 1.0   | <0.001 |

243 Continuous variables are represented as mean ± standard deviation or median (min-max),  
 244 categorical variables are represented as n (%). Hospital Frailty Risk Score (HFRS) is  
 245 calculated according to Gilbert et al.[20]. P-value calculated comparing the mutually-  
 246 exclusive groups Warfarin, DOAC, AP-only, No Antithrombotic medication. Continuous  
 247 variables tested using a Kruskal-Wallis H-test, categorical variables tested using a Chi-

248 *squared test. \*uncontrolled hypertension is not shown for HAS-BLED as it was not detected*  
249 *for any patients. Stroke is only shown under CHA2DS2-VASc but is a factor for both*  
250 *CHA2DS2-VASc and HAS-BLED.*

251

## 252 **Validation of AF diagnosis, Antithrombotic drug prescription and** 253 **NLP risk scores**

254 A diagnosis of AF was confirmed in 96% of 300 cases reviewed. Of these, 200 cases were  
255 manually coded for prescription of any of 10 antithrombotic medications. Five drugs with <5  
256 positive examples in the validation sample were excluded (edoxaban, dipyridamole,  
257 prasugrel, dabigatran, ticagrelor) due to the small sample size. The pipeline achieved perfect  
258 precision and recall for these excluded drugs but the sample size was too small to be  
259 meaningful. The average performance over the remaining 5 drugs was 95% precision at 97%  
260 recall (Table 2).

261

262 **Table 2. Performance of the drug NLP pipeline in manual validation.**

| <b>Drug</b>        | <b>Accuracy</b> | <b>Precision</b> | <b>Recall</b> | <b>F1</b> | <b>P</b> | <b>FN</b> | <b>FP</b> | <b>TN</b> | <b>TP</b> |
|--------------------|-----------------|------------------|---------------|-----------|----------|-----------|-----------|-----------|-----------|
| <b>Warfarin</b>    | 0.94            | 0.87             | 0.97          | 0.92      | 69       | 2         | 10        | 121       | 67        |
| <b>Aspirin</b>     | 0.96            | 0.90             | 0.98          | 0.94      | 62       | 1         | 7         | 131       | 61        |
| <b>Rivaroxaban</b> | 1.00            | 1.00             | 0.95          | 0.98      | 22       | 1         | 0         | 178       | 21        |
| <b>Clopidogrel</b> | 1.00            | 1.00             | 0.94          | 0.97      | 17       | 1         | 0         | 183       | 16        |
| <b>Apixaban</b>    | 1.00            | 1.00             | 1.00          | 1.00      | 13       | 0         | 0         | 187       | 13        |
| <b>Average</b>     | 0.98            | 0.95             | 0.97          | 0.96      |          |           |           |           |           |

263 *Discharge summaries were selected at random (n=200) and manually annotated for the*  
264 *prescription of the 10 drugs detected by the pipeline. Performance for the 5 drugs with > 10*  
265 *positive examples in manual annotation is shown. P = total positive examples in manual*  
266 *annotation, FN = false negative, FP = false positive, TN = true negative, TP = true positive.*

267

268

269 The performance of the automatic NLP scoring procedure was evaluated in 40 patients.

270 Overall the agreement between two human expert raters and the algorithm for CHA<sub>2</sub>DS<sub>2</sub>-

271 VASc was high for all pairs, and only slightly higher for the two human raters than for the

272 algorithm vs. either expert. HAS-BLED agreement however was lower for all comparisons

273 (Table 3 and S2 Table). Total scores and risk factor-level variables are available as S3 Table.

274

275 **Table 3. Inter-rater agreement statistics for CHA<sub>2</sub>DS<sub>2</sub>-VASc and HAS-BLED risk**  
276 **scores.**

| Score                                     | Rater 1   | Rater 2  | Kappa (95% CI)   |
|-------------------------------------------|-----------|----------|------------------|
| <b>CHA<sub>2</sub>DS<sub>2</sub>-VASc</b> | Algorithm | Expert A | 0.76 (0.65-0.86) |
| <b>CHA<sub>2</sub>DS<sub>2</sub>-VASc</b> | Algorithm | Expert B | 0.80 (0.68-0.92) |
| <b>CHA<sub>2</sub>DS<sub>2</sub>-VASc</b> | Expert A  | Expert B | 0.85 (0.73-0.97) |
| <b>HAS-BLED</b>                           | Algorithm | Expert A | 0.54 (0.36-0.72) |
| <b>HAS-BLED</b>                           | Algorithm | Expert B | 0.53 (0.34-0.72) |
| <b>HAS-BLED</b>                           | Expert A  | Expert B | 0.74 (0.51-0.97) |

277 *Raters 1 and 2 are two independent clinician raters, Algorithm is the automatic scoring*

278 *pipeline developed in this paper.*

279

## 280 **Temporal Trends in Antithrombotic drug prescription**

281 Prior to 2013, OAC use varied between 40-45% (mean 43.4%) with no strong trend (linear

282 regression  $R^2=0.08$ , slope = +0.2% per quarter, Fig 2a,b). From 2013 onwards the average

283 OAC rate remained above 47% and there was a gradual increase in OAC use such that at the

284 end of the study period 68.4% of patients were taking an OAC (linear regression  $R^2=0.77$ ,

285 slope = +1.2% per quarter). This increase in OAC rate is particularly pronounced from 2016

286 onwards (linear regression  $R^2=0.86$ , slope = +2.7% per quarter). Conversely, the proportion

287 of patients taking an AP drug alone declined significantly from 48.9% at the start to 14.5% at  
288 the end of the study, with a consistent linear decrease over the period (linear regression  
289  $R^2=0.94$ , slope = -1.24% per quarter).

290

291 **Fig 2. Antithrombotic drug prescribing patterns in the AF cohort patients with**

292 **CHA<sub>2</sub>DS<sub>2</sub>-VASc  $\geq$  2.** A,B) Prescribing rates for all admissions during the study period. A)

293 OAC choice vs. no OAC. B) Prescribing of OAC and/or AP vs. neither. C) Prescribing rates

294 stratified by CHA<sub>2</sub>DS<sub>2</sub>-VASc for all patients. D) Prescribing rates grouped by HFRS as

295 defined by Gilbert et al. Due to low numbers of patients with score > 20 the final (highest)

296 bin is wider than the others. E) Prescribing rate vs. age at discharge. Points are the mean

297 prescribing rate per year for all ages with  $\geq$  10 patients, a 10-year moving median (trend) is

298 shown as a dashed red line. F) prescribing rates in patients grouped by discharging specialty.

299 In C, D, F the number above each bar indicates the number of patients. AP = antiplatelet,

300 HFRS = hospital frailty risk score, OAC = oral anticoagulant.

301

302

303 At the start of the study warfarin was the only widely available OAC. In 2012 NICE endorsed

304 the use of the first 2 DOACs (Dabigatran and Rivaroxaban) and the prescription of both

305 drugs increased from the end of 2012, at a similar time to when overall OAC use began to

306 rise. From then on there was a gradual increase in the use of DOACs at the expense of

307 warfarin, such that at the end of the study period in 2017 warfarin only contributed a third of

308 all OAC prescriptions.

309

310 For newly diagnosed AF (n=4986) Antithrombotic drug trends closely mirrored those found

311 in the overall AF cohort (Fig 3).



312

313 **Fig 3. Prescribing trends for new AF cases over the study period.** The solid blue line  
 314 represents warfarin, the solid pink line represents DOAC, the dashed black line represents AP  
 315 prescription without any OAC, the solid green line represents the no drug group. Total N =  
 316 4986. AP = antiplatelet, DOAC = direct oral anticoagulant, OAC = oral anticoagulant.

317

### 318 **Clinical Factors associated with Antithrombotic drug**

#### 319 **prescription**

320 There was gradual increase in rates of OAC use with a higher CHA<sub>2</sub>DS<sub>2</sub>-VASc score (+1.6%  
 321 per point, linear regression R<sup>2</sup> = 0.93, p < 0.001) (Fig 2c). Conversely OAC prescription  
 322 decreased with older age in patients ≥80 years (Fig 2e).

323

324 In multivariate analysis (Table 4) clinical variables associated with a higher rate of OAC use  
 325 (vs. no OAC) included heart failure, diabetes and stroke. Factors negatively associated with  
 326 OAC use included a history of vascular disease, abnormal liver function and history of  
 327 bleeding. Older patients receiving OAC were more likely to be on warfarin vs. DOACs.

328 Higher rates of AP drug use alone (vs. OAC) were associated with the presence of vascular  
 329 disease, whereas heart failure, and diabetes were associated with lower rates.

330

331 **Table 4. Univariate and multivariate logistic regression for factors associated with**  
 332 **antithrombotic drug prescribing at most recent discharge for patients with CHA<sub>2</sub>DS<sub>2</sub>-**  
 333 **VASc ≥ 2.**

| Group | Factor | Any OAC vs no OAC |                 |               |                 | DOAC vs Warfarin |                 |               |                 | AP-only vs OAC-only |                 |               |                 |
|-------|--------|-------------------|-----------------|---------------|-----------------|------------------|-----------------|---------------|-----------------|---------------------|-----------------|---------------|-----------------|
|       |        | Univariate        |                 | Multivariate  |                 | Univariate       |                 | Multivariate  |                 | Univariate          |                 | Multivariate  |                 |
|       |        | OR<br>(95%CI)     | P-<br>val<br>ue | OR<br>(95%CI) | P-<br>val<br>ue | OR<br>(95%CI)    | P-<br>val<br>ue | OR<br>(95%CI) | P-<br>val<br>ue | OR<br>(95%CI)       | P-<br>val<br>ue | OR<br>(95%CI) | P-<br>val<br>ue |
|       |        |                   |                 |               |                 |                  |                 |               |                 |                     |                 |               |                 |

|                                 |                                  |               |        |               |        |               |        |               |        |               |        |               |        |
|---------------------------------|----------------------------------|---------------|--------|---------------|--------|---------------|--------|---------------|--------|---------------|--------|---------------|--------|
| <b>Other clinical variables</b> | <b>Age (per 20 years)</b>        | 0.9 (0.9-1.0) | 0.0 39 | 0.9 (0.8-0.9) | <0.001 | 1.3 (1.2-1.4) | <0.001 | 0.8 (0.8-0.9) | <0.001 | 1.4 (1.2-1.5) | <0.001 | 1.0 (1.0-1.1) | 0.0 80 |
|                                 | <b>LOS (per 14 days)</b>         | 0.9 (0.9-1.0) | <0.001 | 1.0 (0.9-1.0) | 0.0 16 | 1.1 (1.1-1.2) | <0.001 | 1.1 (1.0-1.1) | 0.0 25 | 1.1 (1.0-1.1) | 0.0 06 | 1.0 (1.0-1.1) | 0.0 73 |
|                                 | <b>Visits (per 10)</b>           | 1.1 (1.0-1.1) | <0.001 | 1.1 (1.1-1.1) | <0.001 | 1.1 (1.1-1.1) | <0.001 | 1.0 (1.0-1.1) | 0.4 46 | 0.9 (0.9-1.0) | <0.001 | 0.9 (0.9-1.0) | <0.001 |
| <b>CHA2DS2-VASc factors</b>     | <b>Congestive heart failure</b>  | 1.7 (1.6-1.8) | <0.001 | 1.7 (1.5-1.8) | <0.001 | 1.0 (0.9-1.1) | 0.8 99 |               |        | 0.7 (0.6-0.8) | <0.001 | 0.7 (0.6-0.8) | <0.001 |
|                                 | <b>Diabetes mellitus</b>         | 1.4 (1.3-1.5) | <0.001 | 1.2 (1.1-1.3) | <0.001 | 1.0 (0.9-1.1) | 0.9 73 |               |        | 0.8 (0.7-0.9) | <0.001 | 0.9 (0.8-1.0) | 0.0 33 |
|                                 | <b>Female</b>                    | 1.0 (0.9-1.0) | 0.3 27 |               |        | 1.2 (1.1-1.4) | 0.0 02 | 1.1 (1.0-1.2) | 0.1 69 | 1.1 (1.0-1.2) | 0.2 21 |               |        |
|                                 | <b>Hypertension</b>              | 1.1 (1.0-1.2) | 0.0 42 | 1.1 (1.0-1.2) | 0.1 37 | 1.4 (1.2-1.5) | <0.001 | 1.1 (0.9-1.2) | 0.2 54 | 1.1 (1.0-1.2) | 0.0 89 |               |        |
|                                 | <b>Stroke</b>                    | 1.1 (1.0-1.2) | 0.0 20 | 1.3 (1.1-1.4) | <0.001 | 1.4 (1.3-1.6) | <0.001 | 1.0 (0.9-1.2) | 0.6 69 | 1.0 (0.9-1.1) | 0.5 51 |               |        |
|                                 | <b>Vascular disease</b>          | 1.1 (1.0-1.2) | 0.0 18 | 0.9 (0.8-0.9) | 0.0 03 | 1.0 (0.9-1.1) | 0.6 85 |               |        | 1.3 (1.1-1.5) | <0.001 | 1.6 (1.4-1.9) | <0.001 |
| <b>HAS-BLED factors</b>         | <b>Abnormal liver function</b>   | 0.7 (0.6-0.9) | <0.001 | 0.7 (0.5-0.8) | <0.001 | 1.0 (0.8-1.3) | 0.9 52 |               |        | 1.1 (0.8-1.4) | 0.5 59 |               |        |
|                                 | <b>Abnormal renal function</b>   | 1.1 (1.0-1.2) | 0.1 36 |               |        | 1.3 (1.1-1.5) | 0.0 02 | 1.0 (0.8-1.1) | 0.5 94 | 0.9 (0.8-1.0) | 0.1 17 |               |        |
|                                 | <b>Bleeding</b>                  | 0.6 (0.5-0.7) | <0.001 | 0.6 (0.5-0.6) | <0.001 | 1.3 (1.1-1.5) | 0.0 14 | 0.9 (0.8-1.2) | 0.6 20 | 1.2 (1.0-1.4) | 0.0 81 |               |        |
| <b>Frailty</b>                  | <b>HFRS (per 10 points)</b>      | 0.8 (0.7-0.9) | <0.001 | 0.7 (0.6-0.8) | <0.001 | 2.6 (2.2-3.0) | <0.001 | 2.1 (1.8-2.6) | <0.001 | 1.2 (1.0-1.4) | 0.0 15 | 1.2 (1.0-1.4) | 0.0 41 |
| <b>Discharge Location</b>       | <b>Stroke</b>                    | 0.6 (0.6-0.7) | <0.001 | (reference)   |        | 1.4 (1.1-1.6) | <0.001 | (reference)   |        | 2.2 (1.9-2.5) | <0.001 | (reference)   |        |
|                                 | <b>Cardiology</b>                | 2.2 (2.0-2.5) | <0.001 | 2.6 (2.2-3.0) | <0.001 | 0.7 (0.6-0.8) | <0.001 | 0.5 (0.4-0.7) | <0.001 | 0.3 (0.3-0.4) | <0.001 | 0.2 (0.2-0.3) | <0.001 |
|                                 | <b>Elderly Care</b>              | 0.8 (0.7-0.9) | <0.001 | 1.2 (1.0-1.4) | 0.0 36 | 1.9 (1.6-2.2) | <0.001 | 0.8 (0.7-1.1) | 0.2 34 | 1.2 (1.0-1.4) | 0.0 13 | 0.6 (0.5-0.7) | <0.001 |
|                                 | <b>Other medical specialties</b> | 0.8 (0.8-0.9) | <0.001 | 1.2 (1.0-1.4) | 0.0 13 | 1.2 (1.0-1.3) | 0.0 23 | 0.7 (0.5-0.8) | <0.001 | 1.0 (0.9-1.1) | 0.9 05 | 0.6 (0.5-0.7) | <0.001 |
|                                 | <b>Surgery &amp; Trauma</b>      | 1.2 (1.1-1.3) | <0.001 | 1.6 (1.4-1.8) | <0.001 | 0.7 (0.6-0.8) | <0.001 | 0.5 (0.4-0.6) | <0.001 | 0.8 (0.7-1.0) | 0.0 13 | 0.5 (0.4-0.5) | <0.001 |

334 All factors significant at  $p < 0.05$  level in univariate analysis were included in the multivariate  
 335 model. HFRS = hospital frailty risk score, LOS = length of stay

336

337

## 338 **Hospital Frailty Risk Score (HFRS) and antithrombotic** 339 **prescription**

340 As HFRS increased, OAC use did not significantly change but there was a clear decrease in  
341 AP drug use either alone or with an OAC (-8.3% per group, linear regression  $R^2 = 0.85$ ,  $p <$   
342  $0.01$ , Fig 2d). However in multivariate analysis increasing HFRS was strongly negatively  
343 associated with OAC use, positively associated with DOAC use and positively associated  
344 with AP drug use only.

345

## 346 **Relationship Between Discharging Specialty and OAC use**

347 We found a large variation in OAC prescribing rates between different specialities (Fig 2f).  
348 The highest rate of OAC use was in patients discharged from cardiology (68.8%,  $n=1048$ ),  
349 with lower rates of OAC use in patients discharged under a surgical team (56.6%,  $n=2768$ ), a  
350 medical specialty (52.3%,  $n=3196$ ), elderly care (46.8%,  $n=1249$ ) and the stroke unit (42.0%,  
351  $n=1222$ ). The relationship between discharge location and antithrombotic drug use remained  
352 significant after correction for a range of clinical variables, age and HFRS (Table 4).

353

## 354 **Medication switching in AF patients**

355 We identified a group of 1708 patients ( $CHA_2DS_2-VASc \geq 2$ ) with 2 or more admissions at  
356 least 12 months apart. Of these 895 (52.4%) changed their antithrombotic medication status  
357 (Fig 4a). Overall there was an increase in OAC use from 985 to 1069 patients (+8.5%) and a  
358 net movement of patients to DOACs from warfarin and AP drugs. These findings were more

359 marked when only patients whose admissions straddled the 2014 NICE guidelines update  
360 were included (1096 patients; Fig 4b).

361

362 **Fig 4. Medication switching in patients with  $CHA_2DS_2-VASc \geq 2$  at last visit.** a) all visits  
363 at least 12 months apart and b) last visit before vs last visit after the 2014 NICE guideline  
364 update (b is a subset of a). Line width indicates overall proportion.

365

366

## 367 **Discussion**

368 We have developed a pipeline to calculate clinical risk scores from free-text using NLP.  
369 Using this pipeline, we were able to estimate CHA<sub>2</sub>DS<sub>2</sub>-VASc and HAS-BLED risk scores  
370 from free-text EHR data that are in line with those calculated manually and could scale up to  
371 analyse data on over 10,000 AF patients managed at a multi-site large UK NHS Trust.

372  
373 We were able to replicate the changes in antithrombotic drug practices observed over the last  
374 7 years in previous registry-based observational studies. First, there has been a substantial  
375 increase in the proportion of AF patients at high risk of stroke (CHA<sub>2</sub>DS<sub>2</sub>-VASc  $\geq 2$ )  
376 prescribed an OAC, with OAC use rising from 42% in 2011 to 62% in 2017. Second, there  
377 has been a reduction in the use of warfarin and an increase in DOAC prescription, such that  
378 in 2017 more patients were discharged on a DOAC than warfarin. Third, the use of AP drugs  
379 alone to prevent stroke has dropped significantly, from 40% in 2011 to 10% in 2017.

380

### 381 **Semantic NLP analysis of routinely-generated clinical data**

382 Clinical applications of NLP are an active research area. A recent systematic review  
383 identified 71 NLP applications for clinical text, 12 of which are open-source.[22] We took  
384 different approaches to NLP for the two major components of our study: extracting  
385 medication from discharge summaries and detecting clinical concepts in text (to derive risk  
386 scores). For medications, we use a series of regular expression rules tuned to the specific  
387 prescription text used in this study with high precision but less generalizability. For risk  
388 scoring, we built a concept mapping pipeline on top of an open-source clinical NLP tool  
389 SemEHR[13], which can detect far more concepts than it is feasible to manually code rules

390 for, but with the trade-off that it is not specifically designed for any particular disease  
391 concepts.

392

## 393 **Use of EHR data for retrospective and prospective applications in** 394 **cardiology**

395 EHRs have been increasingly used to support observational studies. However, typically this  
396 involves the transcription of clinical data from EHRs into a registry-specific electronic case  
397 report form, an approach with many of the limitations inherent of a classical observational  
398 study. The development and maintenance of case registries is time-consuming, and the scope  
399 of the research questions that can be answered are limited to the dataset defined *a priori*. By  
400 using a domain-agnostic concept mapping pipeline (SemEHR) on unstructured text, our study  
401 was able to test both conventional risk scores (CHA<sub>2</sub>DS<sub>2</sub>-VAsC) and a novel risk score  
402 (HFRS).

403

404 Ours is not the first study to utilize unstructured EHR data in AF research.[15–17,23] Our  
405 study builds on this previous work through the use of text data with an NLP pipeline, the  
406 calculation of additional risk scores and an analysis of prescribing patterns. Whilst we  
407 evaluate our pipeline in the context of AF, our aim is to provide an open tool for clinical risk  
408 scoring calculations in general.

409

## 410 **Trends in Antithrombotic drug use**

411 Large retrospective population-based studies have established a clear trend of increased OAC  
412 prescribing in AF patients, driven by uptake of DOACs.[6,7] Our ability to reproduce these

413 findings by applying NLP to unstructured EHR data strongly supports the validity of the NLP  
414 pipeline. In our analysis, OAC prescription was independently associated with risk factors for  
415 stroke and bleeding, consistent with the findings of other studies.

416  
417 Despite a significant increase in OAC use during our study period, ~35% of patients at high  
418 risk of stroke were still not prescribed an OAC indicating there are some remaining barriers  
419 to OAC use. In our data, a documented bleeding problem (present in 14% of the cohort and  
420 associated with 40% reduction in OAC use) and increasing frailty (Table 4) were independent  
421 predictors of OAC underuse, suggesting that perceived risk of bleeding and risk of harm due  
422 to OAC continues, particularly in elderly patients, to have a strong influence on the  
423 antithrombotic drug decision-making process.[24–26]

424  
425 HFRS proposed by Gilbert *et al.* [20] is a high-dimensional frailty score calculated from  
426 ICD-10 diagnostic codes. When we evaluated antithrombotic drug prescription using HFRS  
427 as a continuous variable and adjusting for other clinical variables and discharging specialty,  
428 there was a significant relationship between HFRS and antithrombotic drug use (Table 4).  
429 Patients with a higher HFRS were less likely to take an OAC, more likely to take a DOAC  
430 (vs. warfarin) if they were on an OAC, and more likely to take an AP drug alone versus an  
431 OAC. This suggests there is an underlying high-dimensional frailty characteristic influencing  
432 clinician decision-making despite not being explicitly calculated.

433  
434 The highest OAC prescription rates were in patients discharged from a cardiology ward  
435 (n=1048, 69%), whereas OAC use was significantly lower in patients discharged from an  
436 elderly care ward (n=1240, 47%) and other medical specialties (n=3196, 52%). Although in  
437 part this may reflect the differing case mix of specialty patient populations, given the

438 magnitude of the differences seen even with multivariate correction of clinical variables  
439 (including stroke and bleed risk factors and frailty risk score), it is likely that some of our  
440 findings are due to specialty-specific behaviours in relation to AF and bleeding risk. This  
441 suggests efforts to continue to increase OAC prescribing rates beyond current may be most  
442 effective if targeted by clinical specialty.

443

## 444 **Limitations**

445 One of the major limitations of an EHR- and NLP-based approach, as used in our analysis, is  
446 data accuracy. We manually validated the major variables in our analysis but the accuracy of  
447 our NLP algorithm deserves closer scrutiny as there is a risk of causing a significant  
448 degradation in data accuracy. Whilst the agreement between our algorithm and clinical  
449 experts was high for CHA2DS2-VASc and fair for HAS-BLED, in all comparisons the  
450 agreement between experts was higher. This gap represents room for improvement in the  
451 algorithm primarily due to difficulty detecting some risk factors.

452

453 Retrospective assessment of the data source of many of the variables in the HAS-BLED score  
454 is challenging irrespective of the approach used, with a previous study finding that inter-rater  
455 reliability between human observers for some HAS-BLED components is low.[15] This  
456 disagreement at the level of the data source is commonly described even with curated registry  
457 data.[27] This limitation particularly affected the “uncontrolled hypertension” and “labile  
458 INR” features of the HAS-BLED score, neither of which is reliably recorded or detected.  
459 This leaves some comorbidity associated with bleeding risk unaccounted for in our  
460 multivariate analysis.

461



462 Unlike the use of registry data, routine EHR data may not capture all necessary clinical  
463 information on all patients, as this is a secondary use of the record. It is therefore possible  
464 that we have missed important co-morbidities in some of the patients. This may have led to  
465 an overall underestimation of co-morbidities in our patient population, as well as undermined  
466 some of our analyses relating clinical variables to anti-thrombotic drug use.

467

468 The NLP algorithm was tested on data from one multi-site organization using three different  
469 EHR systems over a 6-year period. While this may show a degree of generalizability, further  
470 validation on data from other EHR systems in other organizations will be needed.

471

472 We used data from inpatient admissions as these more accurately record data on drug  
473 prescriptions. As a result our patient population has the potential to be older and frailer, with  
474 more comorbidity, than typical community AF cohorts. Although our population had similar  
475 baseline characteristics to the populations in previous studies[28,29], not all co-morbidities  
476 may be captured. This is a limitation is inherent in the design of all studies using routinely  
477 generated non-curated data.

478

479 Our study did not attempt to distinguish between the different temporal patterns of atrial  
480 fibrillation (permanent, persistent, paroxysmal). This is because these temporal patterns are  
481 frequently not used in free text or used ambiguously (e.g. 'PAF' could mean any of the  
482 terms). Nonetheless, national and international guidelines on anticoagulation for AF do not  
483 have different anticoagulation recommendations for different temporal patterns.

484

485 Finally, our data is observational. Therefore, although we have demonstrated associations  
486 between changes in antithrombotic drug use and a range of clinical variables, it is not  
487 possible to conclude a causal link.

488

## 489 **Conclusion**

490 We present a novel open-source methodology for an automated pipeline to calculate risk  
491 scores from NLP and track prescribing patterns, incorporating future disease entities, risk  
492 profiles and ontologies. We have used this methodology to demonstrate significant changes  
493 in antithrombotic practice in AF since the introduction of DOACs, in a large NHS Trust. The  
494 tools used in this study are open-source and transparent (CogStack[12], SemEHR[14] and our  
495 pipeline) allowing any other organization to validate on their own cohorts and optimize local  
496 population health at low cost. This highlights the power of semantic NLP processing tools for  
497 a disease-specific domain, but is generalizable to a variety of other diseases and use-cases,  
498 and highlights the growing impact of health informatics in healthcare.[30]

499

## 500 **Acknowledgements**

501 DMB is funded by a UKRI Innovation Fellowship as part of Health Data Research UK  
502 MR/S00310X/1 (<https://www.hdruk.ac.uk>). HW is funded by a UKRI Rutherford Fellowship  
503 as part of Health Data Research UK MR/S004149/1. RB is funded in part by grant  
504 MR/R016372/1 for the King's College London MRC Skills Development Fellowship  
505 programme funded by the UK Medical Research Council (MRC, <https://mrc.ukri.org>) and by  
506 grant IS-BRC-1215-20018 for the National Institute for Health Research (NIHR,  
507 <https://www.nihr.ac.uk>) Biomedical Research Centre at South London and Maudsley NHS

508 Foundation Trust and King's College London. AMS is supported by the British Heart  
509 Foundation (<https://www.bhf.org.uk>). NIHR Biomedical Research Centre funding to  
510 SLAM/KCL and to GSTT/KCL in partnership with KCL. RJBD is supported by: 1. Health  
511 Data Research UK, which is funded by the UK Medical Research Council, Engineering and  
512 Physical Sciences Research Council, Economic and Social Research Council, Department of  
513 Health and Social Care (England), Chief Scientist Office of the Scottish Government Health  
514 and Social Care Directorates, Health and Social Care Research and Development Division  
515 (Welsh Government), Public Health Agency (Northern Ireland), British Heart Foundation  
516 and Wellcome Trust. 2. The BigData@Heart Consortium, funded by the Innovative  
517 Medicines Initiative-2 Joint Undertaking under grant agreement No. 116074. This Joint  
518 Undertaking receives support from the European Union's Horizon 2020 research and  
519 innovation programme and EFPIA; it is chaired, by DE Grobbee and SD Anker, partnering  
520 with 20 academic and industry partners and ESC. 3. The National Institute for Health  
521 Research University College London Hospitals Biomedical Research Centre. 4. National  
522 Institute for Health Research (NIHR) Biomedical Research Centre at South London and  
523 Maudsley NHS Foundation Trust and King's College London.

524

525 This paper represents independent research part funded by the National Institute for Health  
526 Research (NIHR) Biomedical Research Centre at South London and Maudsley NHS  
527 Foundation Trust and King's College London. The views expressed are those of the author(s)  
528 and not necessarily those of the NHS, the NIHR or the Department of Health and Social  
529 Care. The funders had no role in study design, data collection and analysis, decision to  
530 publish, or preparation of the manuscript.

531

532

## 533 **Competing Interests**

534 I have read the journal's policy and the authors of this manuscript have the following  
535 competing interests: Dr. Teo reports non-financial support from Bayer, grants from Bristol-  
536 Meyers-Squibb, outside the submitted work; Dr. scott reports personal fees from Bayer,  
537 outside the submitted work. All other authors declare that no competing interests exist. This  
538 does not alter our adherence to PLOS ONE policies on sharing data and materials.

539

## 540 **References**

- 541 1. Yiin GSC, Howard DPJ, Paul NLM, Li L, Mehta Z, Rothwell PM, et al. Recent time  
542 trends in incidence, outcome and premorbid treatment of atrial fibrillation-related  
543 stroke and other embolic vascular events: a population-based study. *J Neurol*  
544 *Neurosurg Psychiatry*. 2015/10/20. 2017;88: 12–18. doi:10.1136/jnnp-2015-311947
- 545 2. NICE. Atrial fibrillation: management (Aug 2014 update) [Internet]. 2014.
- 546 3. Lip GYH, Nieuwlaat R, Pisters R, Lane DA, Crijns HJGM. Refining Clinical Risk  
547 Stratification for Predicting Stroke and Thromboembolism in Atrial Fibrillation Using  
548 a Novel Risk Factor-Based Approach: The Euro Heart Survey on Atrial Fibrillation.  
549 *Chest*. 2010;137: 263–272. doi:10.1378/chest.09-1584
- 550 4. Pisters R, Lane DA, Nieuwlaat R, de Vos CB, Crijns HJGM, Lip GYH. A Novel User-  
551 Friendly Score (HAS-BLED) To Assess 1-Year Risk of Major Bleeding in Patients  
552 With Atrial Fibrillation: The Euro Heart Survey. *Chest*. 2010;138: 1093–1100.  
553 doi:10.1378/chest.10-0134

- 554 5. Cowan C, Healicon R, Robson I, Long WR, Barrett J, Fay M, et al. The use of  
555 anticoagulants in the management of atrial fibrillation among general practices in  
556 England. *Heart*. 2013;99: 1166–1172. doi:10.1136/heartjnl-2012-303472
- 557 6. Campbell Cowan J, Wu J, Hall M, Orłowski A, West RM, Gale CP. A 10 year study of  
558 hospitalized atrial fibrillation-related stroke in England and its association with uptake  
559 of oral anticoagulation. *Eur Heart J*. 2018; doi:10.1093/eurheartj/ehy411
- 560 7. Lacoïn L, Lumley M, Ridha E, Pereira M, McDonald L, Ramagopalan S, et al.  
561 Evolving landscape of stroke prevention in atrial fibrillation within the UK between  
562 2012 and 2016: a cross-sectional analysis study using CPRD. *BMJ Open*. 2017;7:  
563 e015363. doi:10.1136/bmjopen-2016-015363
- 564 8. Holt TA, Hunter TD, Gunnarsson C, Khan N, Cload P, Lip GYH. Risk of stroke and  
565 oral anticoagulant use in atrial fibrillation: A cross-sectional survey. *Br J Gen Pract*.  
566 2012; doi:10.3399/bjgp12X656856
- 567 9. Hemingway H, Asselbergs FW, Danesh J, Dobson R, Maniadakis N, Maggioni A, et  
568 al. Big data from electronic health records for early and late translational  
569 cardiovascular research: challenges and potential. *Eur Heart J*. 2017;39: 1481–1495.  
570 doi:10.1093/eurheartj/ehx487
- 571 10. Kharrazi H, Anzaldi LJ, Hernandez L, Davison A, Boyd CM, Leff B, et al. The Value  
572 of Unstructured Electronic Health Record Data in Geriatric Syndrome Case  
573 Identification. *J Am Geriatr Soc*. 2018;66: 1499–1507. doi:10.1111/jgs.15411
- 574 11. Jackson R, Kartoglu I, Stringer C, Gorrell G, Roberts A, Song X, et al. CogStack -  
575 Experiences of deploying integrated information retrieval and extraction services in a  
576 large National Health Service Foundation Trust hospital. *BMC Med Inform Decis*  
577 *Mak*. 2018; doi:10.1186/s12911-018-0623-9

- 578 12. CogStack. CogStack Pipeline [Internet]. 2019. Available:  
579 <https://github.com/CogStack/CogStack-Pipeline>
- 580 13. Wu H, Toti G, Morley KI, Ibrahim ZM, Folarin A, Jackson R, et al. SemEHR: A  
581 general-purpose semantic search system to surface semantic data from clinical notes  
582 for tailored care, trial recruitment, and clinical research. *J Am Med Informatics Assoc.*  
583 2018; doi:10.1093/JAMIA/OCX160
- 584 14. Wu H. CogStack-SemEHR [Internet]. p. 2019.
- 585 15. Wang S V, Rogers JR, Jin Y, Fischer MA, Bates DW. Use of electronic healthcare  
586 records to identify complex patients with atrial fibrillation for targeted intervention. *J*  
587 *Am Med Informatics Assoc.* 2016;24: 339–344. doi:10.1093/jamia/ocw082
- 588 16. Grouin C, Deléger L, Rosier A, Temal L, Dameron O, Van Hille P, et al. Automatic  
589 computation of CHA2DS2-VASc score: information extraction from clinical texts for  
590 thromboembolism risk assessment. *AMIA . Annu Symp proceedings AMIA Symp.*  
591 2011;
- 592 17. Rosier A, Mabo P, Temal L, Van Hille P, Dameron O, Deléger L, et al. Personalized  
593 and automated remote monitoring of atrial fibrillation. *Europace.* 2016;  
594 doi:10.1093/europace/euv234
- 595 18. U.S. National Library of Medicine. Unified Medical Language System (UMLS)  
596 [Internet]. Available: <https://www.nlm.nih.gov/research/umls/>
- 597 19. Köhler S, Carmody L, Vasilevsky N, Jacobsen JOB, Danis D, Gourdine JP, et al.  
598 Expansion of the Human Phenotype Ontology (HPO) knowledge base and resources.  
599 *Nucleic Acids Res.* 2019; doi:10.1093/nar/gky1105
- 600 20. Gilbert T, Neuburger J, Kraindler J, Keeble E, Smith P, Ariti C, et al. Development

- 601 and validation of a Hospital Frailty Risk Score focusing on older people in acute care  
602 settings using electronic hospital records: an observational study. *Lancet*. 2018;  
603 doi:10.1016/S0140-6736(18)30668-8
- 604 21. Whetzel PL, Noy NF, Shah NH, Alexander PR, Nyulas C, Tudorache T, et al.  
605 BioPortal: Enhanced functionality via new Web services from the National Center for  
606 Biomedical Ontology to access and use ontologies in software applications. *Nucleic  
607 Acids Res*. 2011; doi:10.1093/nar/gkr469
- 608 22. Kreimeyer K, Foster M, Pandey A, Arya N, Halford G, Jones SF, et al. Natural  
609 language processing systems for capturing and standardizing unstructured clinical  
610 information: A systematic review. *Journal of Biomedical Informatics*. 2017.  
611 doi:10.1016/j.jbi.2017.07.012
- 612 23. Piazza G, Hurwitz S, Galvin CE, Harrigan L, Baklla S, Hohlfelder B, et al. Alert-based  
613 computerized decision support for high-risk hospitalized patients with atrial fibrillation  
614 not prescribed anticoagulation: a randomized, controlled trial (AF-ALERT). *Eur Heart  
615 J*. 2019; doi:10.1093/eurheartj/ehz385
- 616 24. Bahri O, Roca F, Lechani T, Druesne L, Jouanny P, Serot J-M, et al. Underuse of Oral  
617 Anticoagulation for Individuals with Atrial Fibrillation in a Nursing Home Setting in  
618 France: Comparisons of Resident Characteristics and Physician Attitude. *J Am Geriatr  
619 Soc*. 2015;63: 71–76. doi:10.1111/jgs.13200
- 620 25. Lefebvre M-CD, St-Onge M, Glazer-Cavanagh M, Bell L, Kha Nguyen JN, Viet-Quoc  
621 Nguyen P, et al. The Effect of Bleeding Risk and Frailty Status on Anticoagulation  
622 Patterns in Octogenarians With Atrial Fibrillation: The FRAIL-AF Study. *Can J  
623 Cardiol*. 2016;32: 169–176. doi:10.1016/j.cjca.2015.05.012
- 624 26. Pilotto A, Gallina P, Copetti M, Pilotto A, Marcato F, Mello AM, et al. Warfarin

- 625 Treatment and All-Cause Mortality in Community-Dwelling Older Adults with Atrial  
626 Fibrillation: A Retrospective Observational Study. *J Am Geriatr Soc.* 2016/06/13.  
627 2016;64: 1416–1424. doi:10.1111/jgs.14221
- 628 27. Faxon DP, Burgess A. Cardiovascular Registries: Too Much of Good Thing?  
629 *Circulation. Cardiovascular interventions. United States;* 2016. p. e003866.  
630 doi:10.1161/CIRCINTERVENTIONS.116.003866
- 631 28. Marzec LN, Wang J, Shah ND, Chan PS, Ting HH, Gosch KL, et al. Influence of  
632 Direct Oral Anticoagulants on Rates of Oral Anticoagulation for Atrial Fibrillation. *J*  
633 *Am Coll Cardiol.* 2017;69: 2475–2484. doi:<https://doi.org/10.1016/j.jacc.2017.03.540>
- 634 29. Fosbol EL, Holmes DN, Piccini JP, Thomas L, Reiffel JA, Mills RM, et al. Provider  
635 specialty and atrial fibrillation treatment strategies in United States community  
636 practice: findings from the ORBIT-AF registry. *J Am Heart Assoc.* 2013;2: e000110–  
637 e000110. doi:10.1161/JAHA.113.000110
- 638 30. Topol EJ. High-performance medicine: the convergence of human and artificial  
639 intelligence. *Nat Med.* 2019;25: 44–56. doi:10.1038/s41591-018-0300-7

640

641

642

## 643 **Supporting information**

644 **S1 Table. Definition of HAS-BLED and CHA2DS2-VASc as used in this study.** Age and  
645 gender are included directly from electronic health record data. The agreed terms under  
646 “include” and “exclude” headings were used by clinical experts to calculate each score



647 manually. The lists of UMLS concepts for each component were derived automatically and  
648 used by the NLP scoring algorithm.

649

650 **S2 Table. Performance of the NLP pipeline for each component of CHA<sub>2</sub>DS<sub>2</sub>-VASc and**  
651 **HAS-BLED.** Cases were considered positive if at least one manual rater marked as positive.  
652 The agreement between the two manual raters is shown as “agreement between raters”.

653

654 **S3 Table. Total score and component score for CHA<sub>2</sub>DS<sub>2</sub>-VASc and HAS-BLED.** Each  
655 row represents a single patient identified only by row number (“Patient” column).

656

657

658

659

660

661

662

663

664 Figure 1.

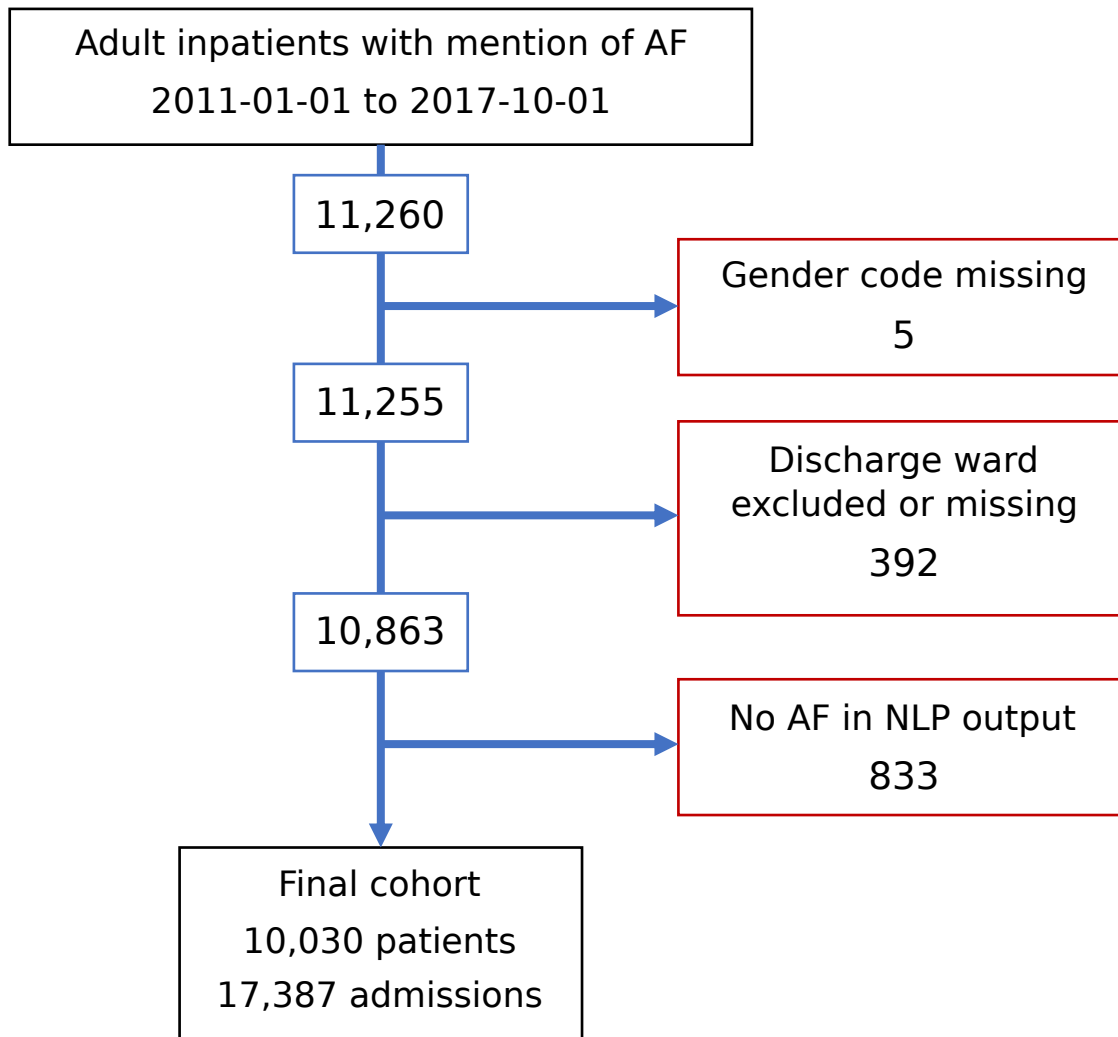

665  
666  
667  
668  
669  
670  
671  
672  
673  
674  
675  
676  
677

678 Figure 2.

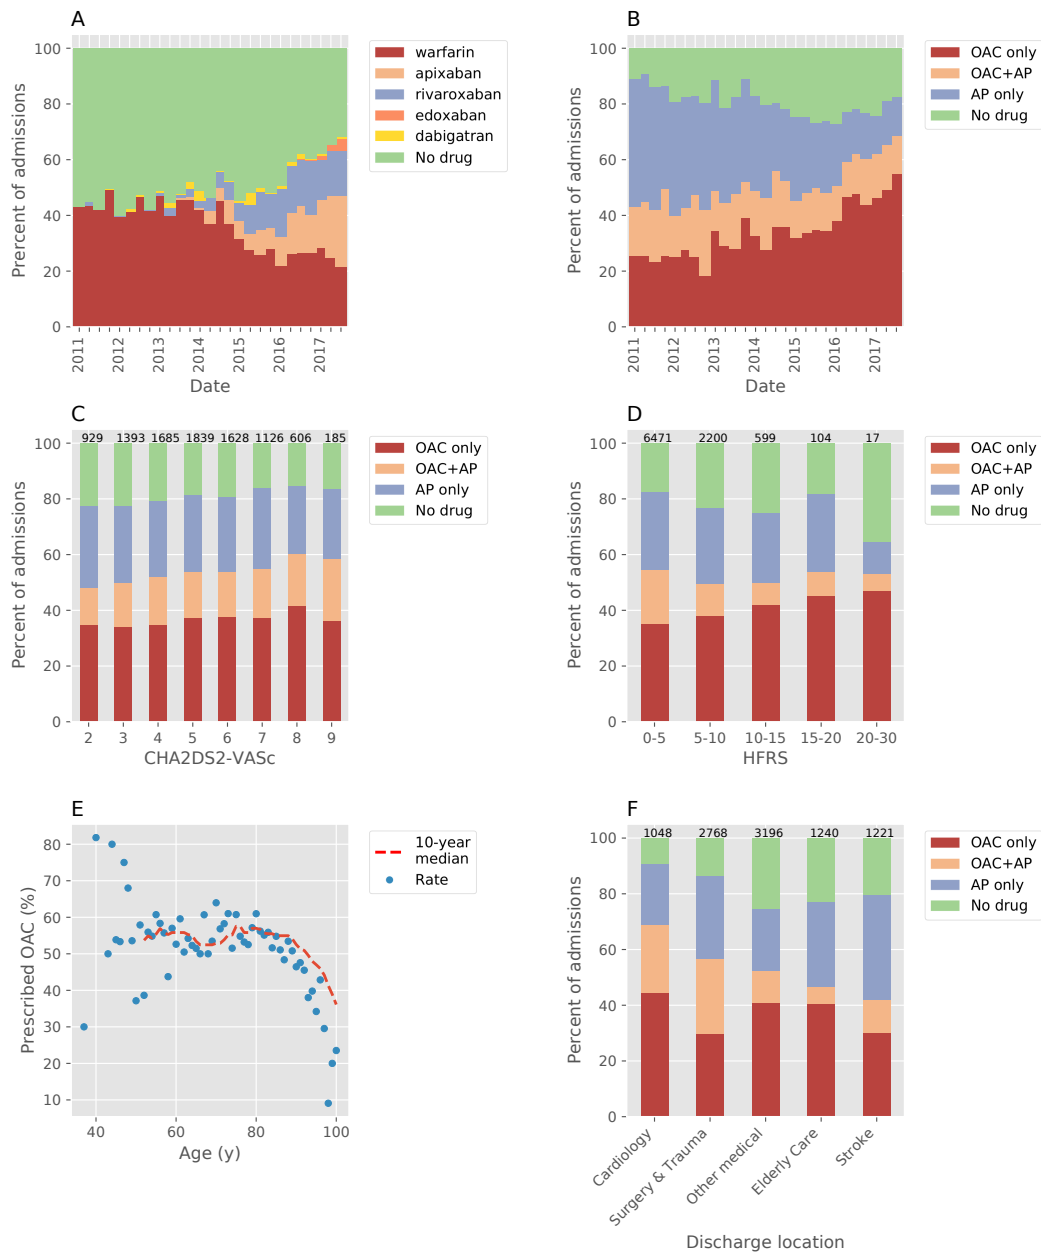

679

680

681

682

683

684

685

686

687

688

689 Figure 3.

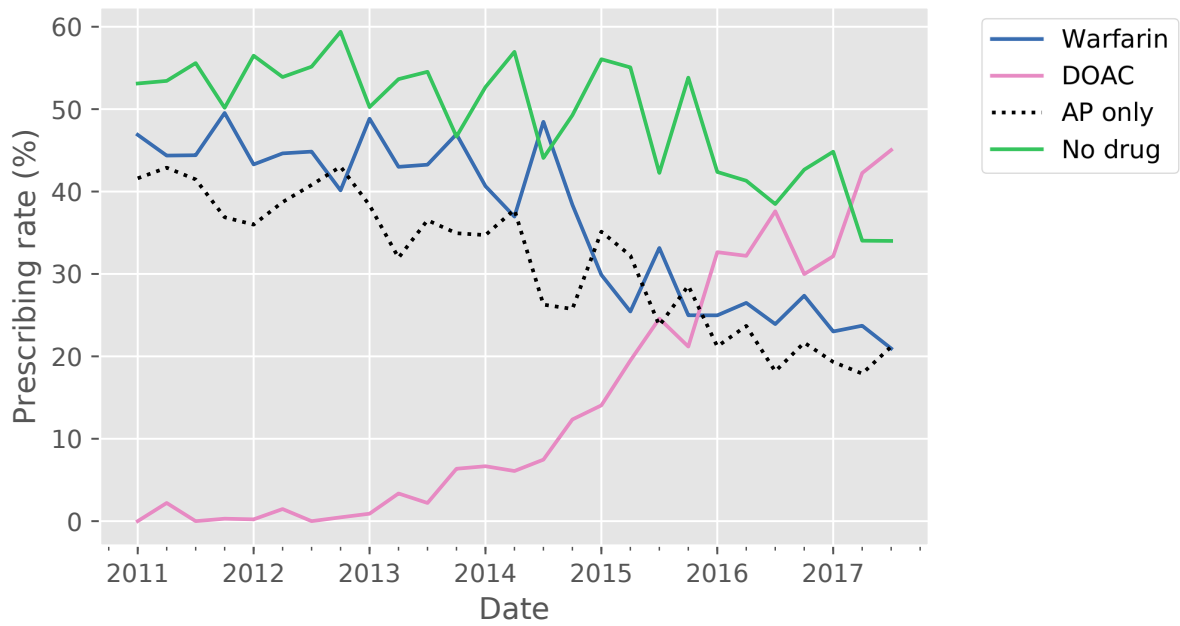

690  
691  
692  
693  
694  
695  
696  
697  
698  
699  
700  
701  
702  
703  
704  
705  
706  
707  
708  
709

710 Figure 4.

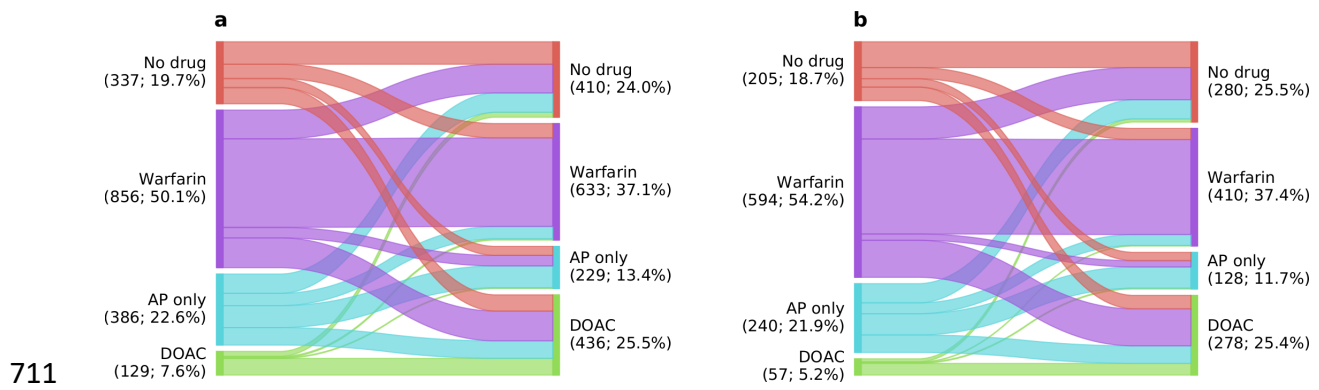

Source: https://medrxiv.org/content/10.1101/19011643v2.full.pdf
